# Supplementary material for: Effect of Mg2+ substitution on the photocatalytic water splitting activity of LaMgxNb1−xO1+3xN2−3x
Source: Royal Society of Chemistry journal article supplement (doi:10.1039/d1ta00164g), 2021-01-01
Supplement: d1ta00164g1.pdf [file d1ta00164g1.pdf]

## Supporting Information

### Effect of Mg<sup>2+</sup> Substitution on Photocatalytic Water Splitting Activity of LaMg<sub>x</sub>Nb<sub>1-x</sub>O<sub>1+3x</sub>N<sub>2-3x</sub>

Jeongsuk Seo<sup>1,2</sup>, Daisaku Ishizuka<sup>3</sup>, Takashi Hisatomi<sup>1</sup>, Tsuyoshi Takata<sup>1</sup>, and Kazunari Domen<sup>1,4,\*</sup>

<sup>1</sup> Research Initiative for Supra-Materials (RISM), Shinshu University, 4-17-1 Wakasato, Nagano 380-8553, Japan;

<sup>2</sup> Department of Chemistry, College of Natural Sciences, Chonnam National University, 77 Yongbong-ro, Buk-gu, Gwangju 61186, Republic of Korea;

<sup>3</sup> Department of Chemical System Engineering, School of Engineering, The University of Tokyo, 7-3-1 Hongo, Bunkyo-ku, Tokyo 113-8656, Japan;

<sup>4</sup> Office of University Professors, The University of Tokyo, 2-11-16 Yayoi, Bunkyo-ku, Tokyo 113-8656, Japan

\* *Corresponding author:* domen@shinshu-u.ac.jp

**Table S1.** Bulk elemental compositions for the synthesized  $\text{LaNbON}_2$  and  $\text{LaMg}_{1/3}\text{Nb}_{2/3}\text{O}_2\text{N}$  photocatalysts, prepared by thermal nitridation of the corresponding oxides at 1123 K for 8 h.

|                                                      | Atomic ratio <sup>a)</sup> |      |      |
|------------------------------------------------------|----------------------------|------|------|
|                                                      | La                         | Mg   | Nb   |
| $\text{LaNbON}_2$                                    | 1.00                       | -    | 1.09 |
| $\text{LaMg}_{1/3}\text{Nb}_{2/3}\text{O}_2\text{N}$ | 1.00                       | 0.34 | 0.68 |

<sup>a)</sup> Determined by ICP-OES analysis.

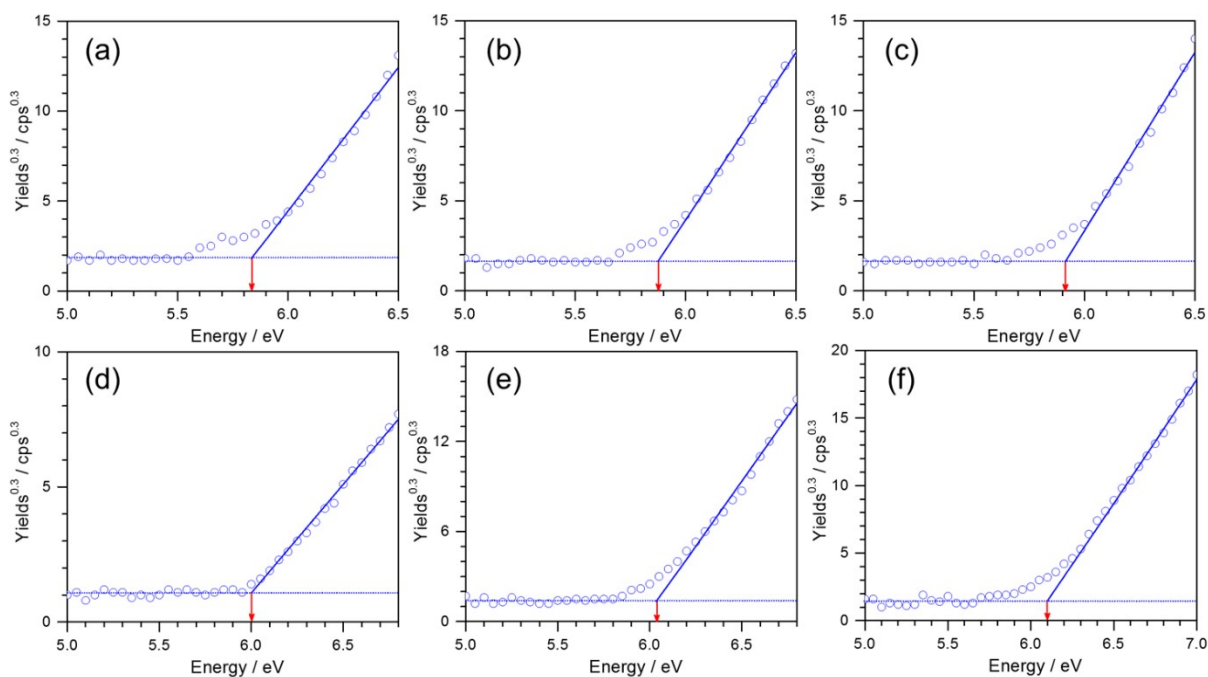

**Figure S1.** Photoelectron spectra in air acquired from  $\text{LaMg}_x\text{Nb}_{1-x}\text{O}_{1+3x}\text{N}_{2-3x}$  series with  $x =$  (a) 0, (b) 0.10, (c) 0.20, (d) 0.33, (e) 0.40 and (f) 0.50, prepared by thermal nitridation of the corresponding oxides at 1123 K for 8 h. The intersection of the background and yield lines indicates the valence band maximum (VBM) potential for each compound.

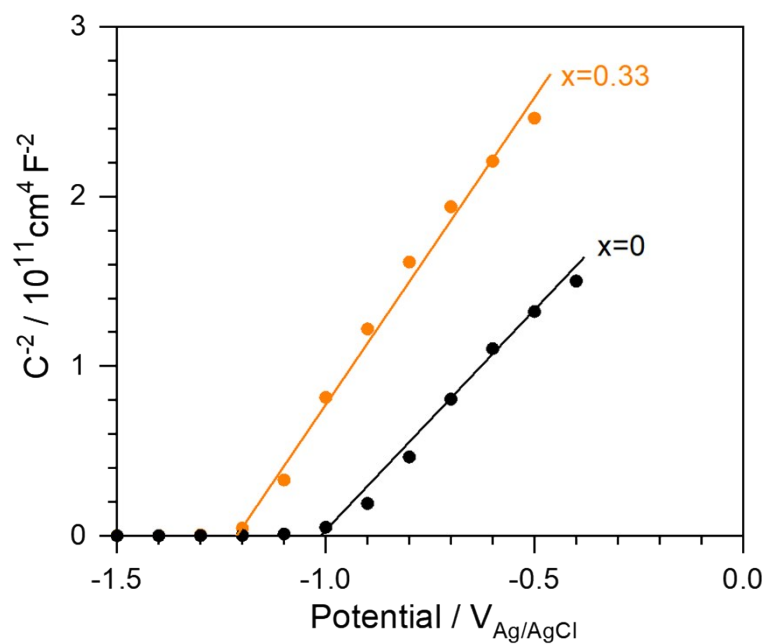

**Figure S2.** Mott-Schottky (MS) plots for bare  $\text{LaMg}_x\text{Nb}_{1-x}\text{O}_{1+3x}\text{N}_{2-3x}$  electrodes with  $x = 0$  and  $0.33$  at pH 13 at a frequency of 1 kHz. Pt wire and Ag/AgCl electrodes were used as a counter and reference electrodes, respectively. The measurements were carried out in an Ar-saturated 0.5 M potassium borate (KBi) aqueous electrolyte under dark condition. The MS plots were recorded by cathodically sweeping the potential with an AC amplitude of 15 mV.

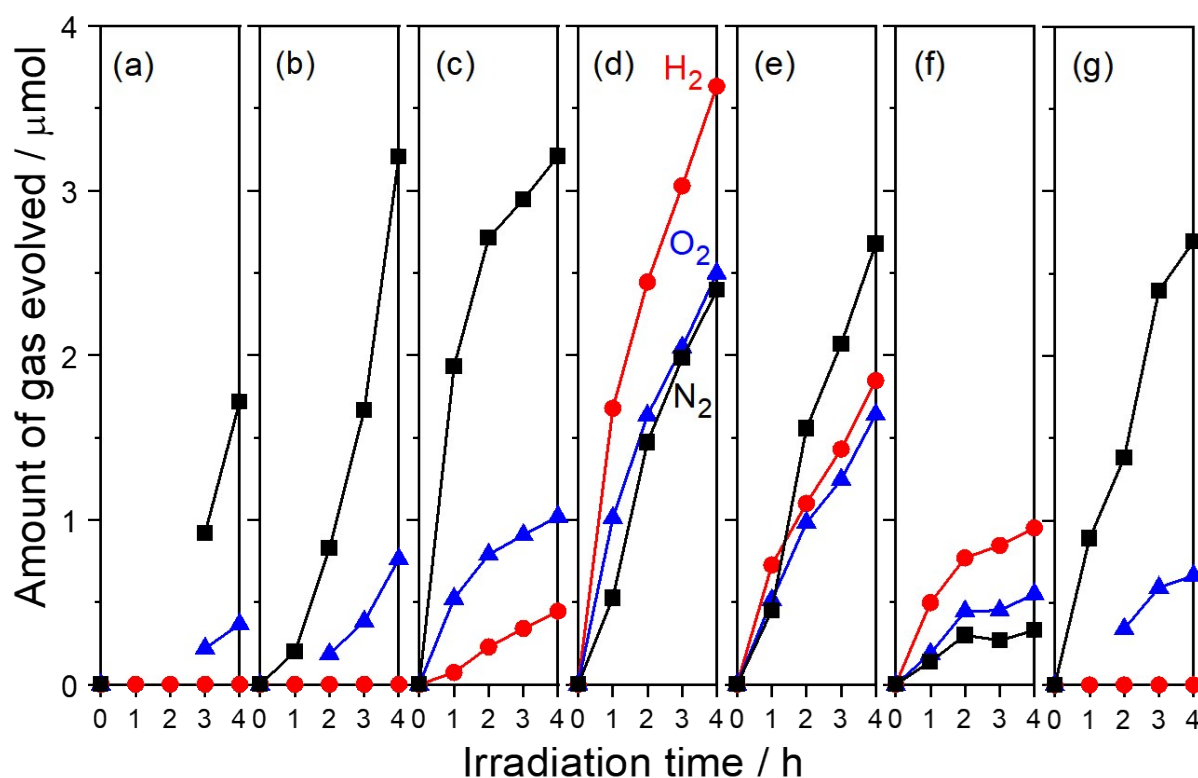

**Figure S3.** Gas evolution during water splitting on 0.2 g portions of  $\text{RhCrO}_y\text{-CoO}_z/\text{LaMg}_x\text{Nb}_{1-x}\text{O}_{1+3x}\text{N}_{2-3x}$  photocatalysts with  $x =$  (a) 0, (b) 0.1, (c) 0.2, (d) 0.33, (e) 0.4 and (f) 0.5, and (g) a blank trial without a catalyst. Data were acquired in a top-irradiation-type reaction vessel including 150 mL of pure water under 300 W Xe lamp irradiation ( $\lambda > 380$  nm). The oxynitride surfaces were modified with 0.2 wt%  $\text{RhCrO}_y$  and 0.1 wt%  $\text{CoO}_z$  as cocatalysts for  $\text{H}_2$  and  $\text{O}_2$  evolution, respectively.

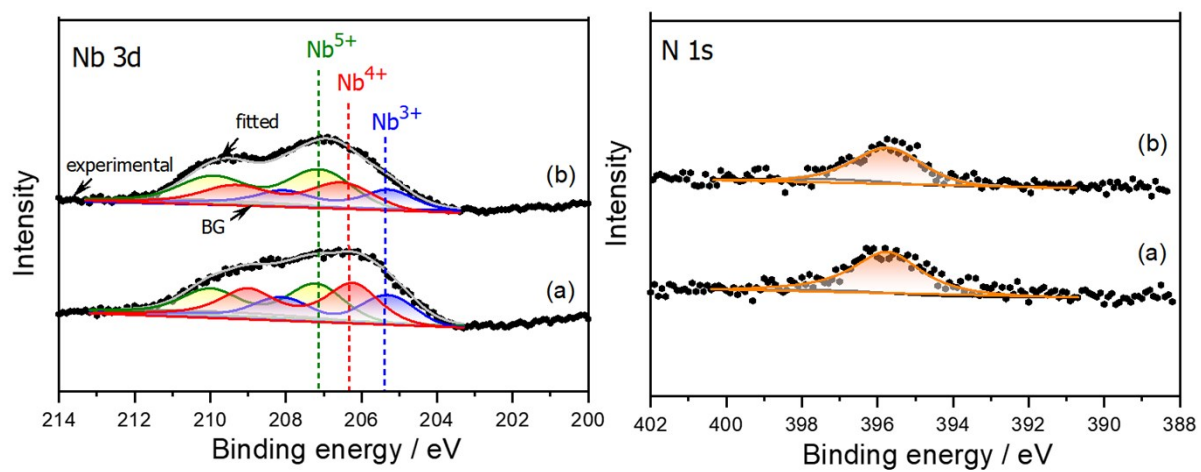

**Figure S4.** Narrow-scan Nb 3d and N 1s XPS spectra obtained from  $\text{LaMg}_{1/3}\text{Nb}_{2/3}\text{O}_2\text{N}$  particles (a) before and (b) after water splitting reaction.

**Table S2.** Surface compositions of  $\text{LaMg}_x\text{Nb}_{1-x}\text{O}_{1+3x}\text{N}_{2-3x}$  photocatalysts with  $x = 0, 0.20, 0.33, 0.40$  and  $0.50$  as determined from the Nb 3d and N 1s XPS spectra in Figure 5 and Figure S4.

| Mg <sup>2+</sup> contents | Surface N/Nb ratio | Fractions of surface Nb species       |                                       |                                       |                                                           |
|---------------------------|--------------------|---------------------------------------|---------------------------------------|---------------------------------------|-----------------------------------------------------------|
|                           |                    | Nb <sup>5+</sup> /Nb <sub>total</sub> | Nb <sup>4+</sup> /Nb <sub>total</sub> | Nb <sup>3+</sup> /Nb <sub>total</sub> | (Nb <sup>4+</sup> +Nb <sup>3+</sup> )/Nb <sub>total</sub> |
| 0                         | -                  | 0.23                                  | 0.25                                  | 0.52                                  | 0.77                                                      |
| 0.2                       | -                  | 0.32                                  | 0.29                                  | 0.40                                  | 0.68                                                      |
| 0.33                      | 1.39               | 0.39                                  | 0.30                                  | 0.31                                  | 0.61                                                      |
| 0.33, after reaction      | 1.41               | 0.39                                  | 0.31                                  | 0.30                                  | 0.61                                                      |
| 0.4                       | -                  | 0.47                                  | 0.31                                  | 0.21                                  | 0.52                                                      |
| 0.5                       | -                  | 0.73                                  | 0.26                                  | 0.00                                  | 0.26                                                      |

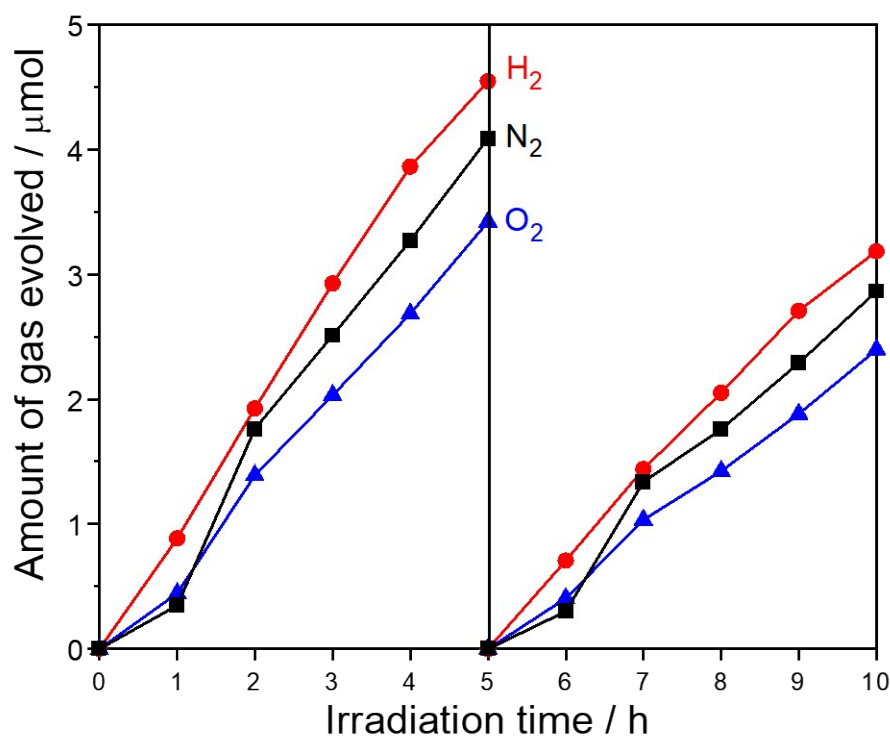

**Figure S5.** Gas evolution during water splitting on 0.24 g portions of RhCrO<sub>y</sub>-CoO<sub>z</sub>/LaMg<sub>1/3</sub>Nb<sub>2/3</sub>O<sub>2</sub>N catalysts in a top-irradiation-type reaction vessel including 150 mL of pure water and 0.2 g La<sub>2</sub>O<sub>3</sub> under visible light irradiation (300 W Xe lamp;  $\lambda > 420$  nm). The oxynitride surfaces were modified with 0.6 wt% RhCrO<sub>y</sub> and 0.3 wt% CoO<sub>z</sub> as cocatalysts for H<sub>2</sub> and O<sub>2</sub> evolution, respectively. After a 5 h reaction the vessel was evacuated and another 5 h reaction was carried out in the same manner.
